# Supplementary material
Source: PubMed Central journal article supplement (PMC11044222)
Supplement: NIHMS1545512-supplement-1.pdf [file NIHMS1545512-supplement-1.pdf]

Supplementary Materials

Supplementary Table 1. ICD 9, ICD10 of interest

A. Comorbidities of interest

|                                 | ICD9                                                                                                          | ICD10                                                                                                                                                                   |
|---------------------------------|---------------------------------------------------------------------------------------------------------------|-------------------------------------------------------------------------------------------------------------------------------------------------------------------------|
| Myocardial infarction           | 410.x, 412.x                                                                                                  | I21.x, I22.x, 125.2                                                                                                                                                     |
| Congestive heart failure        | 398.91, 402.01, 402.11, 402.91, 404.01, 404.03, 404.11, 404.13, 404.91, 404.93, 425.4-425.9, 428.x            | I09.9, I11.0, I13.0, I13.2, I25.5, I42.0, I42.5-I42.9, I43.x, I50.x, P29.0                                                                                              |
| Peripheral vascular disease     | O93.0, 437.4, 440.x, 441.x, 443.1-443.9, 47.1, 557.1, 557.9 V43.4                                             | I70.x, I71.x, I73.1, I73.8, I73.9, I77.1, I79.0, I79.2, K55.1 K55.8, K55.9, Z95.8, Z95.9                                                                                |
| Cerebrovascular accident        | 362.34, 430.x-438.x                                                                                           | G45.x, G46.x, H34.0, I60.x-I69.x                                                                                                                                        |
| Dementia                        | 290.x, 294.1, 331.2                                                                                           | FOO.x-F03.x, F05.1, G30.x, G31.1                                                                                                                                        |
| Chronic Pulmonary Disease       | 416.8, 416.9, 490.x-505.x, 506.4, 508.1, 508.8                                                                | 127.8, 127.9, J40.x-J47.x, J60.x-J67.x, J68.4, J70.1, J70.3                                                                                                             |
| Rheumatic disease               | 446.5, 710.0-710.4, 714.0-714.2, 714.8, 725.x                                                                 | M05.x, M06.x, M31.5, M32.x-M34.x, M35.1, M35.3, M36.0                                                                                                                   |
| Peptic ulcer disease            | 531.x-534.x                                                                                                   | K25.x-K28.x                                                                                                                                                             |
| Mild liver disease              | 070.22, 070.23, 070.32, 070.33, 070.44, 070.54, 070.6, 070.9, 570.x, 571.x, 573.3, 573.4, 573.8, 573.9, V42.7 | B18.x, K70.0-K70.3, K70.9, K71.3-K71.5, K71.7, K73.x, K74.x, K76.0, K76.2-K76.4, K76.8, K76.9, Z94.4                                                                    |
| Diabetes without adverse events | 250.0-250.3, 250.8, 250.9                                                                                     | E10.0, E10.1, E10.6, E10.8, E10.9, E11.0, E11.1, E11.6, E11.8, E11.9, E12.0, E12.1, E12.6, E12.8, E12.9, E13.0, E13.1, E13.6, E13.8, E13.9, E14.0, E14.1, E14.6, E14.8, |

|                                  |                                                                                                                                      |                                                                                                          |
|----------------------------------|--------------------------------------------------------------------------------------------------------------------------------------|----------------------------------------------------------------------------------------------------------|
|                                  |                                                                                                                                      | E14.9                                                                                                    |
| Diabetes with adverse events     | 250.4-250.7                                                                                                                          | E10.2-E10.5, E10.7, E11.2-E11.5, E11.7, E12.2-E12.5, E12.7, E13.2- E13.5, E13.7, E14.2-E14.5, E14.7      |
| Hemiplegia                       | 334.1, 342.x, 343.x, 344.0-344.6, 344.9                                                                                              | G04.1, G11.4, G80.1, G80.2, G81.x, G82.x, G83.0-G83.4, G83.9                                             |
| Renal Disease                    | 403.01, 403.11, 403.91, 404.02, 404.03, 404.12, 404.13, 404.92, 404.93, 582.x, 583.0-583.7, 585.x, 586.x, 588.0, V42.0, V45.1, V56.x | I12.0, I113.1, N03.2-N03.7, N05.2- N05.7, N18.x, N19.x, N25.0, Z49.0-Z49.2, Z94.0, Z99.2                 |
| Malignancy                       | 140.x-172.x, 174.x-195.8, 200.x-208.x, 238.6                                                                                         | COO.x-C26.x, C30.x-C34.x, C37.x- C41.x, C43.x, C45.x-C58.x, C60.x-C76.x, C81.x-C85.x, C88.x, C90.x-C97.x |
| Moderate or severe liver disease | 456.0-456.2, 572.2-572.8                                                                                                             | 185.0, I185.9, I186.4, I198.2, K70.4, K71.1, K72.1, K72.9, K76.5, K76.6, K76.7                           |
| Metastatic solid tumor           | 196.x-199.x                                                                                                                          | C77.x-C80.x                                                                                              |
| AIDS/HIV                         | 042.x-044.x                                                                                                                          | B20.x-B22.x, B24.x                                                                                       |
| Coagulopathy                     | 286.x, 287.1, 287.3- 287.5                                                                                                           | D65-D68.x, D69.1, D69.3-D69.6                                                                            |
| Colon cancer                     | 153.0-153.9 159.0, 209.10-209.16, 230.3, V100.5                                                                                      | C18.x, C19.xM                                                                                            |
| Rectal Cancer                    | 154.0- 154.8,209.17, 230.4-230.6, 796.70-796.76, V100.6                                                                              | C20.x                                                                                                    |

## B. Outcomes of interest

|                                      | ICD9                                                                                                                                                        | ICD10                                                                                                                                                      |
|--------------------------------------|-------------------------------------------------------------------------------------------------------------------------------------------------------------|------------------------------------------------------------------------------------------------------------------------------------------------------------|
| <b>GI adverse events</b>             |                                                                                                                                                             |                                                                                                                                                            |
| Upper GI Hemorrhage                  | 456.0, 456.20, 530.7, 530.82, 531.0x, 531.2x, 531.4, 531.6x, 532.0x, 532.2x, 532.4x, 532.6x, 533.0x, 533.2x, 533.4x, 533.6x, 534.0x, 534.2x, 534.4x, 534.6x | K92.2, K92.1, K29.01, K31.811, K57.x, K29.x, K25.0, K25.2, K25.4, K25.6,                                                                                   |
| Lower GI Hemorrhage                  | 569.3, 578.0, 578.1, 578.9, 998.1x                                                                                                                          | K62.5, D62, T81.0, K92.2,                                                                                                                                  |
| Perforation                          | 569.83, 998.2, E870.8, E870.9                                                                                                                               | K63.1, S36.5, S36.50, S36.51, S36.52, S36.53, S36.54, S36.59, S36.6, S36.7, S36.8x, S36.9                                                                  |
| <b>Cardiovascular adverse events</b> |                                                                                                                                                             |                                                                                                                                                            |
| Myocardial infarction                | 410.x, 412.x                                                                                                                                                | I21.x, I22.x, 125.2                                                                                                                                        |
| Congestive heart failure             | 398.91, 402.01, 402.11, 402.91, 404.01, 404.03, 404.11, 404.13, 404.91, 404.93, 425.4-425.9, 428.x                                                          | I09.9, I11.0, I13.0, I13.2, I25.5, I42.0, I42.5-I42.9, I43.x, I50.x, P29.0                                                                                 |
| Cerebrovascular accident             | 362.34, 430.x-438.x                                                                                                                                         | G45.x, G46.x, H34.0, I60.x-I69.x                                                                                                                           |
| Arrhythmia                           | 426.0, 426.13, 426.7, 426.9, 426.10, 426.12, 427.0-427.4, 427.6-427.9, 785.0, 996.01, 996.04, V45.0, V53.3                                                  | 144.1-I144.3, 145.6, I145.9, I47.x-I49.x, ROO.0, R00.1, R00.8, T82.1, Z45.0, Z95.0                                                                         |
| <b>Infectious adverse events</b>     |                                                                                                                                                             |                                                                                                                                                            |
| Pneumonia                            | 507, 507.0, 997.32, 997.39, 486                                                                                                                             | J13, J14, J18.9, J18.8, J18.1, J18.0, J18.2, J15.0, J15.1, J15.20, J15.211, J15.212, J15.29, J15.3, J15.4, J15.5, J15.6, J15.7, J15.8, J15.9, J16.0, J16.8 |
| Sepsis                               | 038.0, 038.10, 038.11, 038.12, 038.19, 038.2, 038.3, 038.4, 038.41-038.44, 038.49, 038.8, 038.9, 995.91, 995.92                                             | A40.0, A40.1, A40.3, A40.8, A40.9, A41.2, A41.01, A41.02, A41.1, A41.2, A41.4, A41.3, A41.50, A41.51, A41.52,                                              |

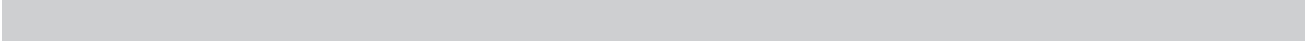

|  |  |                                                                                     |
|--|--|-------------------------------------------------------------------------------------|
|  |  | A41.53, A41.59, A41.81,<br>A41.89, A41.9, A42.7,<br>A54.86, B37.7 R65.20,<br>R65.21 |
|--|--|-------------------------------------------------------------------------------------|

Journal Pre-proof

Supplementary Table 2. Adjusted odds ratio of adverse events after EMR.

|                                     | <b>GIB</b>       | <b>Perforation</b> | <b>Cardiac</b>   | <b>Infection</b> | <b>Any Admission</b> |
|-------------------------------------|------------------|--------------------|------------------|------------------|----------------------|
| <b>Age</b>                          | 1.04 (1.03-1.05) | 1.03 (1.00-1.05)   | 1.09 (1.08-1.10) | 1.06 (1.04-1.07) | 1.03 (1.02-1.03)     |
| <b>CCI</b>                          | 1.06 (1.01-1.11) | 0.97 (0.84-1.12)   | 1.17 (1.12-1.22) | 1.25 (1.19-1.32) | 1.09 (1.06-1.11)     |
| <b>Race (vs White)</b>              |                  |                    |                  |                  |                      |
| Asian                               | 0.55 (0.27-1.11) | 0.89 (0.19-3.27)   | 0.38 (0.16-0.93) | 0.99 (0.43-2.27) | 0.73 (0.57-0.94)     |
| Black                               | 1.17 (0.87-1.57) | 0.49 (0.18-1.36)   | 0.87 (0.62-1.22) | 0.71 (0.42-1.19) | 1.01 (0.90-1.14)     |
| Hispanic                            | 0.56 (0.34-0.91) | 1.24 (0.57-2.73)   | 0.67 (0.42-1.08) | 1.02 (0.59-1.78) | 0.89 (0.76-1.04)     |
| <b>Female (vs Male)</b>             | 0.79 (0.66-0.96) | 0.99 (0.63-1.54)   | 0.80 (0.65-0.98) | 0.95 (0.71-1.27) | 0.98 (0.91-1.05)     |
| <b>Procedure Year</b>               | 0.97 (0.91-1.04) | 1.05 (0.88-1.24)   | 0.99 (0.92-1.07) | 0.92 (0.82-1.02) | 0.92 (0.90-0.95)     |
| <b>Region (vs West)<sup>1</sup></b> |                  |                    |                  |                  |                      |
| Northeast                           | 1.08 (0.78-1.50) | 0.60 (0.27-1.32)   | 0.82 (0.57-1.17) | 0.96 (0.58-1.58) | 0.88 (0.76-1.01)     |
| Midwest                             | 1.17 (0.87-1.56) | 0.70 (0.37-1.35)   | 0.94 (0.68-1.29) | 1.00 (0.63-1.59) | 1.09 (0.96-1.22)     |
| South                               | 0.94 (0.70-1.26) | 0.83 (0.45-1.52)   | 1.09 (0.80-1.48) | 1.14 (0.74-1.77) | 1.25 (1.16-1.40)     |

<sup>1</sup>West (AZ, CO, ID, MT, NV, NM, UT, WY, AK, CA, HI, OR, WA); Northeast (CT, ME, MA, NH, RI, VT, NJ, NY, PA); Midwest (IL, IN, MI, OH, WI, IA, KS, MN, MO, NE, ND, SD); South (DE, DC, FL, GA, MD, NC, SC, VA, WV, AL, KY, TN, AR, LA, OK, TX).

CCI, Charlson comorbidity index; EMR, endoscopic mucosal resection; GIB, gastrointestinal bleed

Supplementary Table 3. Adjusted odds ratio of adverse events after simple polypectomy

|                                     | <b>GIB</b>       | <b>Perforation</b> | <b>Cardiac</b>   | <b>Infection</b> | <b>Any Admission</b> |
|-------------------------------------|------------------|--------------------|------------------|------------------|----------------------|
| <b>Age</b>                          | 1.06 (1.05-1.06) | 1.04 (1.03-1.04)   | 1.10 (1.09-1.10) | 1.06 (1.05-1.06) | 1.03 (1.03-1.04)     |
| <b>CCI</b>                          | 1.26 (1.25-1.27) | 1.12 (1.07-1.15)   | 1.25 (1.24-1.26) | 1.34 (1.33-1.35) | 1.29 (1.28-1.29)     |
| <b>Race (vs White)</b>              |                  |                    |                  |                  |                      |
| Asian                               | 0.85 (0.76-0.95) | 0.59 (0.26-0.95)   | 0.58 (0.50-1.67) | 0.62 (0.51-0.75) | 0.68 (0.64-0.72)     |
| Black                               | 1.30 (1.24-1.37) | 0.93 (0.75-1.15)   | 1.17 (1.10-1.24) | 1.30 (1.20-1.39) | 1.28 (1.25-1.31)     |
| Hispanic                            | 1.07 (1.00-1.14) | 0.90 (0.69-1.16)   | 0.93 (0.86-1.00) | 1.12 (1.02-1.23) | 1.09 (1.06-1.12)     |
| <b>Female (vs Male)</b>             |                  |                    |                  |                  |                      |
|                                     | 0.88 (0.84-0.91) | 1.41 (1.24-1.61)   | 0.78 (0.75-0.82) | 0.94 (0.89-0.99) | 1.01 (0.88-1.03)     |
| <b>Procedure Year</b>               | 0.96 (0.95-0.97) | 0.84 (0.80-0.88)   | 0.94 (0.93-0.96) | 0.95 (0.89-0.99) | 0.92 (0.92-0.93)     |
| <b>Region (vs West)<sup>1</sup></b> |                  |                    |                  |                  |                      |
| Northwest                           | 1.36 (1.27-1.46) | 1.31 (1.02-1.69)   | 1.43 (1.33-1.55) | 1.15 (1.05-1.27) | 1.39 (1.25-1.33)     |
| Midwest                             | 1.34 (1.25-1.44) | 1.49 (1.18-1.87)   | 1.44 (1.34-1.55) | 1.14 (1.04-1.25) | 1.33 (1.29 -1.37)    |
| South                               | 1.28 (1.20-1.37) | 1.21 (0.97-1.52)   | 1.28 (1.20-1.39) | 1.14 (1.04-1.24) | 1.24 (1.21-1.28)     |

<sup>1</sup>West (AZ, CO, ID, MT, NV, NM, UT, WY, AK, CA, HI, OR, WA); Northeast (CT, ME, MA, NH, RI, VT, NJ, NY, PA); Midwest (IL, IN, MI, OH, WI, IA, KS, MN, MO, NE, ND, SD); South (DE, DC, FL, GA, MD, NC, SC, VA, WV, AL, KT, MI, TN, AR, LA, OK, TX).

CCI, Charlson comorbidity index; EMR, endoscopic mucosal resection; GIB, gastrointestinal bleed

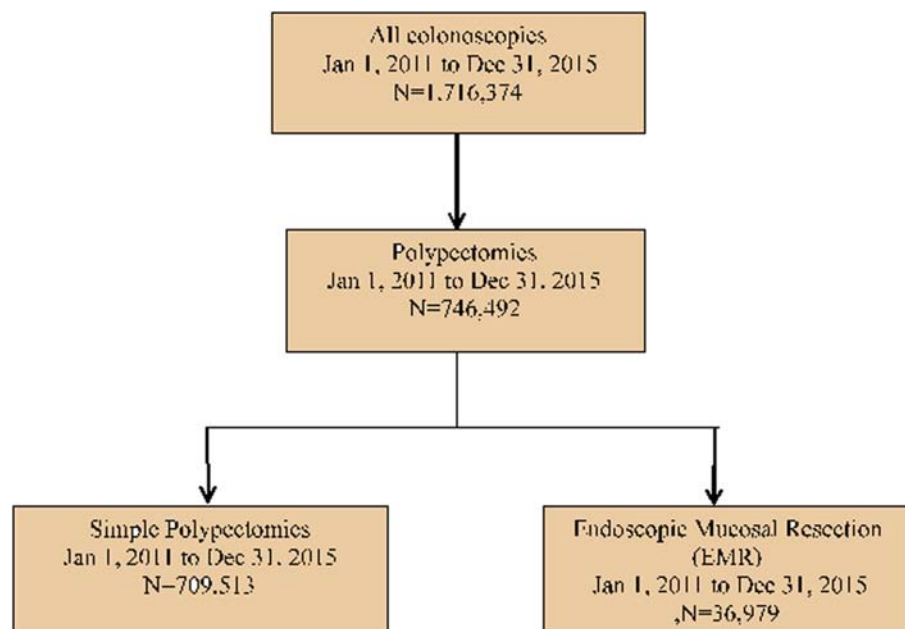

Journal Pre-proof
